# Supplementary material for: Uncovering the Molecular Machinery of the Human Spindle—An Integration of Wet and Dry Systems Biology
Source: PubMed Central journal article supplement (PMC3302876; doi:10.1371/journal.pone.0031813), 2012-03-09
Supplement: pone.0031813.s009.pdf [file pone.0031813.s009.pdf]

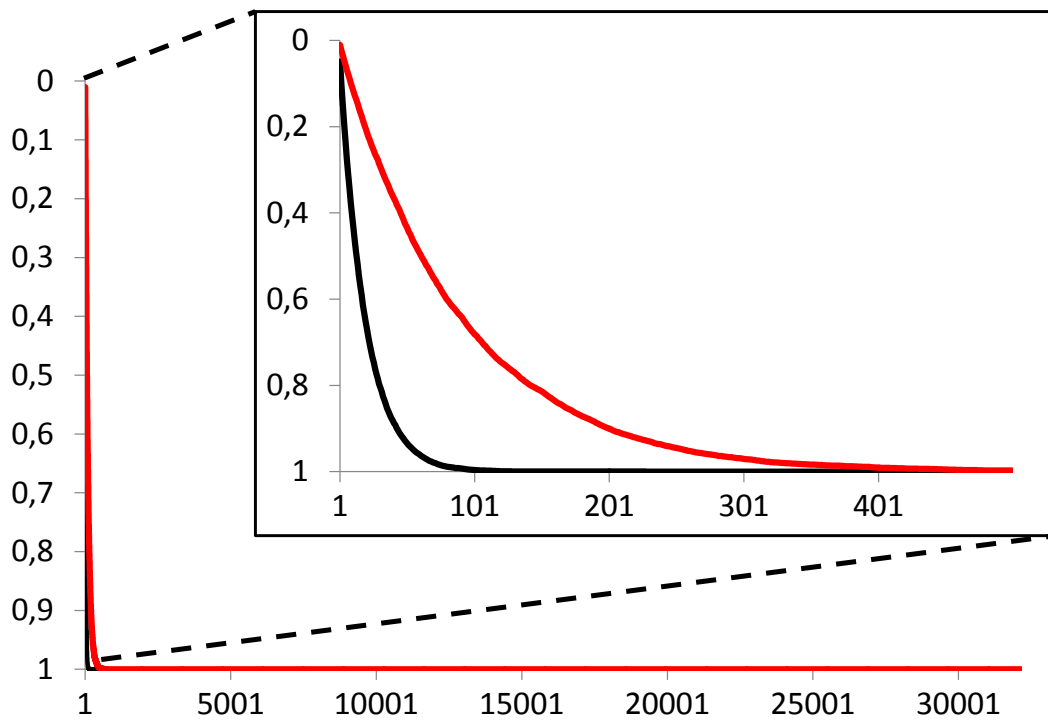

**Figure S9. Random test for the analysis of the statistical significance of the Mitochek enrichments.** Random probability (x axis) to obtain TP/FP enrichment ratios equal to or greater than those observed in each of the two Mitochek ranked lists: the all-Mitochek dataset: black line; and the spindle related subset: red line. The inset shows the enlarged image of the probability distributions for the first 500 ranked positions.
